# Supplementary material for: Robustness of biomarker determination in breast cancer by RT-qPCR: impact of tumor cell content, DCIS and non-neoplastic breast tissue
Source: Diagn Pathol. 2018 Oct 20;13:83. doi: 10.1186/s13000-018-0760-6 (PMC6195967; doi:10.1186/s13000-018-0760-6)
Supplement: Supplementary file 2 — Mammatyper® Median Cq values are shown for the effect of adipose tissue. (XLSX 16 kb) [file 13000_2018_760_MOESM2_ESM.xlsx]

## Sheet: AF 2
Sample #	Tumor	ERBB2			ESR1			PGR			MKI67			B2M			CALM2
	content	Median Cq			Median Cq			Median Cq			Median Cq			Median Cq			Median Cq
	[%]	whole tissue	tumor-enriched	adipose tissue	whole tissue	tumor-enriched	adipose tissue	whole tissue	tumor-enriched	adipose tissue	whole tissue	tumor-enriched	adipose tissue	whole tissue	tumor-enriched	adipose tissue	whole tissue	tumor-enriched	adipose tissue
1	80-100	27.27	27.21	33.04	26.65	26.28	33.82	29.40	29.24	35.88	30.85	30.42	36.92	21.84	21.91	27.21	30.18	29.99	35.23
2		26.56	26.65	34.47	24.98	25.23	33.80	27.83	28.40	37.25	30.93	31.00	37.54	22.98	23.44	27.81	30.66	30.61	35.33
3		28.72	28.35	35.85*	29.20	29.03	37.81*	28.05	28.17	40.00*	31.93	31.82	40.00*	23.93	24.04	30.78*	31.70	31.69	40.00*
4		28.34	28.92	40.00*	28.08	28.53	36.33*	30.16	30.76	40.00*	32.63	33.39	40.00*	23.87	24.91	30.81*	32.31	33.08	40.00*
5		29.73	28.97	34.3	29.00	28.37	33.63	29.25	28.36	34.67	31.73	30.76	37.15	24.14	23.75	27.56	31.94	31.46	35.47
6		26.94	26.89	40.00*	26.91	26.72	35.16*	26.60	26.27	36.42*	30.23	30.09	40.00*	22.45	22.66	29.23*	30.26	30.35	36.66*
7		27.27	26.78	33.95	26.85	26.23	33.41	26.91	26.58	34.38	29.84	29.32	37.60	21.71	21.02	27.19	30.02	29.86	35.11
8		29.72	29.98	35.93*	28.80	28.98	35.08*	29.81	30.27	35.96*	32.17	33.56	36.82*	24.87	25.78	27.96*	32.72	33.41	36.45*
9		25.00	24.86	32.86	23.84	23.60	33.47	23.78	23.48	33.64	28.88	28.68	37.05	20.53	19.98	26.35	28.01	27.91	33.83
10		28.53	27.57	33.26	26.96	25.94	31.73	32.62	33.24	35.62	29.96	29.17	34.07	21.52	21.20	24.42	30.39	30.07	33.62
* invalid MammaTyper® test result
